# Supplementary material for: Light intensity regulates phototaxis, foraging and righting behaviors of the sea urchin Strongylocentrotus intermedius
Source: PeerJ. 2019 Nov 8;7:e8001. doi: 10.7717/peerj.8001 (PMC6844242; doi:10.7717/peerj.8001)
Supplement: Supplemental Information 2 — TD, test diameter (mm); TH, test height (mm); BW, body weight (g). [file peerj-07-8001-s002.xlsx]

## Sheet: Sheet1
Treatment		No	TD	TH	BW	Foraging time (s)
No light		1	10.14	5.56	0.59	271
		2	10.62	5.66	0.6	69
		3	12.01	5.71	0.87	420
		4	9.98	5.34	0.5	420
		5	10.94	5.52	0.67	420
		6	12.76	6.11	0.95	135
		7	9.51	4.93	0.47	420
		8	10.5	4.57	0.55	420
		9	9.96	5.61	0.56	420
		10	9.18	4.91	0.37	420
Low light	24 lx	1	10.95	5.57	0.75	279
		2	12.68	6.21	0.97	420
		3	10.03	5.74	0.56	257
		4	10.33	5.11	0.52	420
		5	10.77	6.02	0.58	420
		6	8.9	4.25	0.47	420
		7	8.46	4.09	0.36	420
		8	10.29	4.74	0.53	420
		9	10.48	5.65	0.57	420
		10	10.87	5.63	0.68	420
	209 lx	1	12.47	7.08	0.5	99
		2	12.43	6.57	0.4	325
		3	10.18	5.55	0.6	374
		4	13.19	7.28	1	420
		5	9.19	5.97	0.4	133
		6	8.69	5.24	0.4	416
		7	9.84	5.11	0.63	411
		8	8.7	4.86	0.46	414
		9	10.68	5.33	0.69	108
		10	10.45	5.15	0.61	84
High light	252 lx	1	9.71	5.3	0.46	376
		2	9.75	4.87	0.55	185
		3	11.65	6.45	0.77	361
		4	10.22	5.18	0.53	145
		5	10.62	5.01	0.52	81
		6	13.71	6.2	1.25	97
		7	13.17	5.97	1.14	118
		8	13.22	6.55	1.03	50
		9	12.9	6.13	1.11	141
		10	12.24	5.75	0.84	162
	2280 lx	1	8.84	4.94	0.2	420
		2	8.39	4.73	0.3	420
		3	9.54	5.19	0.3	139
		4	8.89	5.49	0.3	420
		5	7.52	4.74	0.3	136
		6	12.6	6.43	1	420
		7	11.21	5.35	0.67	420
		8	11.82	5.96	0.8	420
		9	9.26	4.18	0.45	187
		10	10.56	5.38	0.75	420
