# Supplementary material for: Light intensity regulates phototaxis, foraging and righting behaviors of the sea urchin Strongylocentrotus intermedius
Source: PeerJ. 2019 Nov 8;7:e8001. doi: 10.7717/peerj.8001 (PMC6844242; doi:10.7717/peerj.8001)
Supplement: Supplemental Information 3 — TD, test diameter (mm); TH, test height (mm); BW, body weight (g). [file peerj-07-8001-s003.xlsx]

## Sheet: Sheet1
	Righting
		TD	TH	BW	Righting response time
No light	1	10.22	5.9	0.57	29
	2	10.76	6.83	0.68	51
	3	10.76	5.76	0.66	45
	4	10.17	6.29	0.64	35
	5	9.01	5.52	0.43	43
	6	9.03	5.27	0.45	88
	7	10.62	5.61	0.59	57
	8	8.7	4.83	0.41	68
	9	10.37	5.53	0.52	83
	10	8.87	5.06	0.41	69
Low light	1	9.65	7.73	0.4	60.72
	2	10.31	6.51	0.4	32.44
	3	8.44	4.03	0.3	81.45
	4	9.31	5.78	0.4	86
	5	12.53	8.17	0.7	37.7
	6	10.41	5.78	0.55	73
	7	11.09	5.69	0.66	72
	8	11.07	5.29	0.65	99
	9	10.91	5.65	0.62	118
	10	10.54	5.77	0.56	72
High light	1	9.04	5.92	0.4	87.89
	2	10.54	6.07	0.4	300
	3	9.06	5.44	0.3	300
	4	9.76	6.09	0.4	300
	5	9.25	5.41	0.3	42.52
	6	10.32	5.34	0.5	166
	7	10.07	5.32	0.52	143
	8	10.49	5.15	0.57	228
	9	9.51	5.34	0.49	175
	10	9.97	5.25	0.47	207
